# Supplementary material
Source: Hindawi journal article supplement (doi:10.1155/2012/718791)
Supplement: f1 [file 718791.f1.pdf]

Figure 1. Inclusion complex formation of TMP/  $\gamma$ -CD and SMX /  $\beta$ -CD

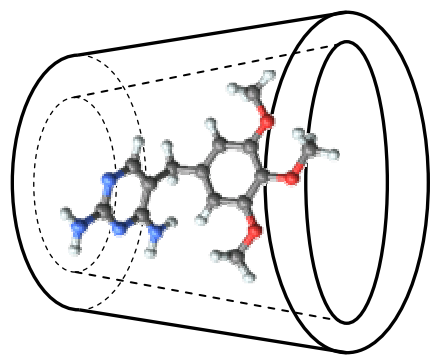

TMP/  $\gamma$ -CD

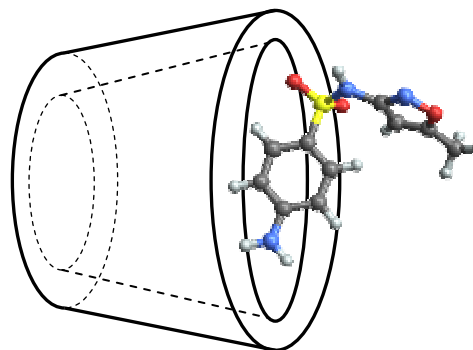

SMX /  $\beta$ -CD
