# Supplementary material
Source: Hindawi journal article supplement (doi:10.1155/2012/718791)

Figure 2. Micellar solubilization of TMP and SMX by SDS micelles

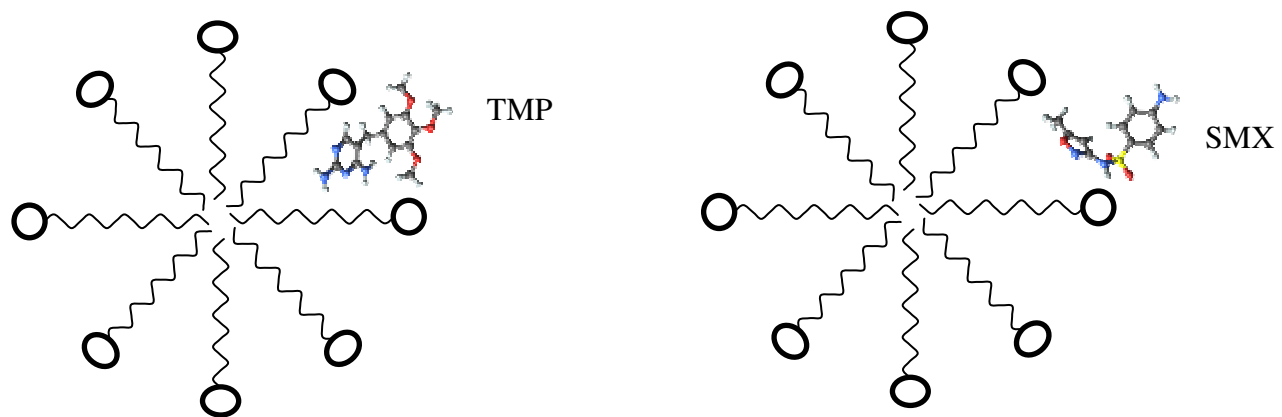

Supplement: f2 [file 718791.f2.pdf]
